# Supplementary material
Source: publisher site journal article supplement (https://www.dovepress.com/article/396321)
Supplement: Supplementary file 1 [file get_supplementary_file.php]

**Supplemental Table 1** Association of ENO1 protein expression in breast cancer tissue and prognosis stratified by Histological grade

| **ENO1 expression** | **OS** | | |  | **PFS** | | |
| --- | --- | --- | --- | --- | --- | --- | --- |
| **Events/Total** | **Crude**  **HR (95% CI)** | **Adjusted**  **HR (95% CI) a** |  | **Events/Total** | **Crude**  **HR (95% CI)** | **Adjusted**  **HR (95% CI) a** |
| **Overall** |  |  |  |  |  |  |  |
| Low | 69/435 | 1.00 (reference) | 1.00 (reference) |  | 107/435 | 1.00 (reference) | 1.00 (reference) |
| High | 61/449 | 0.90 (0.64,1.27) | 0.87 (0.61,1.26) |  | 91/449 | 0.86 (0.65,1.14) | 0.85 (0.64,1.14) |
| **Grade I/II** |  |  |  |  |  |  |  |
| Low | 50/346 | 1.00 (reference) | 1.00 (reference) |  | 81/346 | 1.00(reference) | 1.00 (reference) |
| High | 37/302 | 0.87 (0.57,1.33) | 0.97 (0.62,1.51) |  | 60/302 | 0.88(0.63,1.23) | 0.97(0.69,1.37) |
| **Grade III** |  |  |  |  |  |  |  |
| Low | 19/81 | 1.00 (reference) | 1.00 (reference) |  | 26/81 | 1.00(reference) | 1.00 (reference) |
| High | 24/147 | 0.83 (0.46,1.52) | 0.68 (0.36,1.32) |  | 31/147 | 0.75(0.45,1.27) | 0.61 (0.35,1.07) |
| ***P* interaction** | ***-*** | 0.93 | 0.41 |  | - | 0.69 | 0.20 |
| a: Adjusted for age at diagnosis, clinical stage, ER and HER2 status. | | | | | | | |

**Supplemental Table 2** Association of ENO1 protein expression in breast cancer tissue and prognosis stratified by ER status

| **ENO1 expression** | **OS** | | |  | **PFS** | | |
| --- | --- | --- | --- | --- | --- | --- | --- |
| **Events/Total** | **Crude**  **HR (95% CI)** | **Adjusted**  **HR (95% CI) a** |  | **Events/Total** | **Crude**  **HR (95% CI)** | **Adjusted**  **HR (95% CI) a** |
| **Overall** |  |  |  |  |  |  |  |
| Low | 68/450 | 1.00 (reference) | 1.00 (reference) |  | 109/450 | 1.00 (reference) | 1.00 (reference) |
| High | 61/472 | 0.91 (0.64,1.29) | 0.93 (0.65,1.33) |  | 96/472 | 0.88 (0.67,1.16) | 0.91 (0.68,1.22) |
| **ER negative** |  |  |  |  |  |  |  |
| Low | 16/84 | 1.00 (reference) | 1.00 (reference) |  | 22/84 | 1.00 (reference) | 1.00 (reference) |
| High | 29/163 | 0.94 (0.51,1.73) | 0.87 (0.46,1.64) |  | 42/163 | 0.97 (0.58,1.62) | 0.89 (0.52,1.52) |
| **ER positive** |  |  |  |  |  |  |  |
| Low | 52/366 | 1.00 (reference) | 1.00 (reference) |  | 87/366 | 1.00 (reference) | 1.00 (reference) |
| High | 32/309 | 0.78 (0.50,1.22) | 0.91 (0.58,1.44) |  | 54/309 | 0.78(0.55,1.09) | 0.87 (0.61,1.24) |
| ***P* interaction** | ***-*** | 0.64 | 0.94 |  | - | 0.46 | 0.89 |
| a: Adjusted for age at diagnosis, clinical stage, histological grade and HER2 status. | | | | | | | |

**Supplemental Table 3** Association of ENO1 protein expression in breast cancer tissue and prognosis stratified by HER2 status

| **ENO1 expression** | **OS** | | |  | **PFS** | | |
| --- | --- | --- | --- | --- | --- | --- | --- |
| **Events/Total** | **Crude**  **HR (95% CI)** | **Adjusted**  **HR (95% CI) a** |  | **Events/Total** | **Crude**  **HR (95% CI)** | **Adjusted**  **HR (95% CI) a** |
| **Overall** |  |  |  |  |  |  |  |
| Low | 73/470 | 1.00 (reference) | 1.00 (reference) |  | 115/470 | 1.00 (reference) | 1.00 (reference) |
| High | 64/491 | 0.89 (0.63,1.24) | 0.86 (0.59,1.24) |  | 100/491 | 0.87 (0.67,1.14) | 0.86 (0.64,1.15) |
| **HER2 negative** |  |  |  |  |  |  |  |
| Low | 47/327 | 1.00 (reference) | 1.00 (reference) |  | 83/327 | 1.00 (reference) | 1.00 (reference) |
| High | 44/314 | 1.03 (0.69,1.56) | 1.04 (0.67,1.63) |  | 67/314 | 0.87 (0.63,1.20) | 0.86 (0.60,1.22) |
| **HER2 equivocal/positive** | |  |  |  |  |  |  |
| Low | 26/143 | 1.00 (reference) | 1.00 (reference) |  | 32/143 | 1.00 (reference) | 1.00 (reference) |
| High | 20/177 | 0.66 (0.37,1.19) | 0.60 (0.31,1.14) |  | 33/177 | 0.90 (0.55,1.46) | 0.82 (0.48,1.40) |
| ***P* interaction** | - | 0.22 | 0.11 |  | - | 0.92 | 0.79 |
| a: Adjusted for age at diagnosis, clinical stage, histological grade and ER status. | | | | | | | |

**Supplemental Table 4** Demographic and clinicopathological characteristics and the associations with ENO1 mRNA expression in TCGA-BRCA cohort

| **Factors** | **Total *N* =1034** | **ENO1 expression** | | ***P*** |
| --- | --- | --- | --- | --- |
| **Low (n=517)** | **High (n=517)** |
| **Age** |  |  |  | 0.08 |
| ≤35 | 34 (3.3) | 18 (3.5) | 16 (3.1) |  |
| 36-50 | 280 (27.1) | 124 (24.0) | 156 (30.2) |  |
| ≥51 | 720 (69.6) | 375 (72.5) | 345 (66.7) |  |
| **Menopause** |  |  |  | 0.12 |
| Pre | 219 (23.3) | 114 (24.2) | 105 (22.5) |  |
| Peri | 38 (4.0) | 13 (2.8) | 25 (5.4) |  |
| Post | 682 (72.6) | 345 (73.1) | 337 (72.2) |  |
| missing | 95 | 45 | 50 |  |
| **Nodal status** |  |  |  | **<0.01** |
| no | 446 (50.1) | 205 (44.9) | 241 (55.5) |  |
| yes | 445 (49.9) | 252 (55.1) | 193 (44.5) |  |
| missing | 143 | 60 | 83 |  |
| **Race** |  |  |  | **0.02** |
| White | 719 (75.8) | 384 (79.7) | 335 (71.7) |  |
| Black | 169 (17.8) | 71 (14.7) | 98 (21.0) |  |
| Asian | 61 (6.4) | 27 (5.6) | 34 (7.3) |  |
| missing | 85 | 35 | 50 |  |
| **Clinical stage** |  |  |  | 0.46 |
| I/II | 791 (76.5) | 390 (75.4) | 401 (77.6) |  |
| III | 243 (23.5) | 127 (24.6) | 116 (22.4) |  |
| **ER** |  |  |  | **<0.01** |
| Negative | 228 (23.1) | 37 (7.5) | 191 (38.6) |  |
| Positive | 760 (76.9) | 456 (92.5) | 304 (61.4) |  |
| missing | 46 | 24 | 22 |  |
| **PR** |  |  |  | **<0.01** |
| Negative | 326 (33.1) | 88 (17.9) | 238 (48.3) |  |
| Positive | 658 (66.9) | 403 (82.1) | 255 (51.7) |  |
| missing | 50 | 26 | 24 |  |
| **HER-2** |  |  |  | **0.02** |
| Negative | 537 (62.2) | 267 (62.4) | 270 (62.1) |  |
| Equivocal | 170 (19.7) | 97 (22.7) | 73 (16.8) |  |
| Positive | 156 (18.1) | 64 (15.0) | 92 (21.1) |  |
| missing | 171 | 89 | 82 |  |
| Bold character indicates statistically significant result. | | | | |

**Supplemental Table 5** Association of ENO1 mRNA expression with OS in TCGA-BRCA cohort stratified by ER status

| **ENO1 expression** | **Events/Total** | **Crude**  **HR (95%CI)** | **Adjusted**  **HR (95% CI) a** | |
| --- | --- | --- | --- | --- |
| **Overall** |  |  |  | |
| Low | 33/493 | 1.00 (reference) | 1.00 (reference) | |
| High | 48/495 | 1.19 (0.76,1.86) | 1.17 (0.66,2.08) | |
| **ER negative** |  |  |  | |
| Low | 4/37 | 1.00 (reference) | 1.00 (reference) | |
| High | 26/191 | 1.85 (0.64,5.32) | 4.69 (0.59,37.05) | |
| **ER positive** |  |  |  | |
| Low | 29/456 | 1.00 (reference) | 1.00 (reference) | |
| High | 22/304 | 0.76 (0.43,1.34) | 0.56 (0.25,1.28) | |
| ***P* interaction** | - | 0.13 | 0.07 | |
| a: Adjusted for age at diagnosis, race, clinical stage and HER2 status. | | | |

**Supplemental Table 6** Association of ENO1 mRNA expression with OS in TCGA-BRCA cohort stratified by HER2 status

| **ENO1 expression** | **Events/Total** | **Crude**  **HR (95%CI)** | **Adjusted**  **HR (95% CI) a** | |
| --- | --- | --- | --- | --- |
| **Overall** |  |  |  | |
| Low | 25/428 | 1.00 (reference) | 1.00 (reference) | |
| High | 29/435 | 1.15 (0.67,1.97) | 0.88 (0.47,1.64) | |
| **HER2 negative** |  |  |  | |
| Low | 16/267 | 1.00 (reference) | 1.00 (reference) | |
| High | 15/270 | 0.82 (0.41,1.67) | 0.59 (0.25,1.38) | |
| **HER2 equivocal/positive** | |  |  | |
| Low | 9/161 | 1.00 (reference) | 1.00 (reference) | |
| High | 14/163 | 1.79 (0.77,4.14) | 1.07 (0.40,2.88) | |
| ***P* interaction** | - | 0.17 | 0.64 | |
| a: Adjusted for age at diagnosis, race, clinical stage and ER status. | | | |
